# Supplementary material for: Ion pairing in aqueous tetramethylammonium–acetate solutions by neutron scattering and molecular dynamics simulations
Source: Royal Society of Chemistry journal article supplement (doi:10.1039/d4cp04312j), 2024-12-23
Supplement: d4cp04312j1.pdf [file d4cp04312j1.pdf]

Cite this: DOI: 00.0000/xxxxxxxxxx

## ELECTRONIC SUPPLEMENTARY INFORMATION (ESI): Ion pairing in aqueous tetramethylammonium–acetate solutions by neutron scattering and molecular dynamics simulations

Ngoc Lan Le Nguyen,<sup>[a]</sup> Ondrej Tichacek,<sup>[a]</sup> Pavel Jungwirth,<sup>[a]</sup> Hector Martinez-Seara,<sup>[a]</sup> Philip E. Mason,<sup>\*[a]</sup> Elise Duboué-Dijon,<sup>\*[b]</sup>

### 1 Additional computational details

All performed the simulations are listed in Table S1.

Table S1: List of all simulated TMA–acetate systems

|   | System                  | Scaling factor | TMA force field | Acetate force field | Water model  |
|---|-------------------------|----------------|-----------------|---------------------|--------------|
| 1 | CHARMM36-FULL           | 1.00           | FULL            | FULL                |              |
| 2 | CHARMM36-ECC85          | 0.85           | ECC85           | ECC85               |              |
| 3 | CHARMM36-ECC75          |                | ECC75           | ECC75               |              |
| 4 | CHARMM36-Low CH dipole  |                |                 | ECC75               | CHARMM-TIP3P |
| 5 | CHARMM36-Low CO dipole  | 0.75           | Low CH          | Low CO              |              |
| 6 | CHARMM36-High CO dipole |                |                 | High CO             |              |
| 7 | AMBER99SB-FULL          | 1.00           | FULL            | FULL                |              |
| 8 | AMBER99SB-ECC85         | 0.85           | ECC85           | ECC85               | TIP3P        |
| 9 | AMBER99SB-ECC75         | 0.75           | ECC75           | ECC75               |              |

Table S2 lists all the TMA force fields used in the performed MD simulations.

Table S2: Details of the different TMA force fields used in this study. The employed atoms types are specified in parenthesis.

|           | TMA force field | Atom (atom type) partial charge |           |          | Overall charge |
|-----------|-----------------|---------------------------------|-----------|----------|----------------|
|           |                 | N (NTL)                         | C (CTL5)  | H (HL)   |                |
| CHARMM36  | FULL            | -0.60                           | -0.35     | 0.25     | +1.00          |
|           | ECC85           | -0.60                           | -0.35     | 0.2375   | +0.85          |
|           | ECC75           | -0.61                           | -0.35     | 0.23     | +0.75          |
|           | Low CH          | -0.05                           | -0.10     | 0.10     |                |
| AMBER99SB |                 | N (n4)                          | C (c3)    | H (hx)   |                |
|           | FULL            | 0.255981                        | -0.454050 | 0.213352 | +1.00          |
|           | ECC85           | 0.255980                        | -0.454051 | 0.200852 | +0.85          |
|           | ECC75           | 0.255980                        | -0.454052 | 0.192519 | +0.75          |

Table S3 lists all the acetate (Ac) force fields used in the performed MD simulations.

<sup>a</sup> Institute of Organic Chemistry and Biochemistry of the Czech Academy of Sciences, Flemingovo nám. 542, 160 00 Praha 6, Czech Republic, Email: philip.mason@uochb.cas.cz

<sup>b</sup> Université Paris Cité, CNRS, Laboratoire de Biochimie Théorique, 13 rue Pierre et Marie Curie, 75005, Paris, France, E-mail: elise.duboue-dijon@cnrs.fr

Table S3: Details of all acetate force fields used in this study. The employed atoms types are specified in parenthesis.

| Acetate<br>force field | Atom (atom type) partial charge |         |          |          | Overall charge |       |
|------------------------|---------------------------------|---------|----------|----------|----------------|-------|
|                        | C (CC)                          | O (OC)  | C (CT3)  | H (HA3)  |                |       |
| CHARMM36               | FULL                            | 0.620   | -0.760   | -0.370   | 0.090          | -1.00 |
|                        | ECC85                           | 0.527   | -0.646   | -0.3145  | 0.0765         | -0.85 |
|                        | ECC75                           | 0.465   | -0.570   | -0.2775  | 0.0675         | -0.75 |
|                        | Low CO                          | 0.225   | -0.450   | -0.2775  | 0.0675         | -0.75 |
|                        | High CO                         | 0.925   | -0.800   | -0.2775  | 0.0675         | -0.75 |
| AMBER99SB              |                                 | C (C)   | O (O2)   | C (CT)   | H (HC)         |       |
|                        | FULL                            | 0.88641 | -0.84114 | -0.22228 | 0.00605        | -1.00 |
|                        | ECC85                           | 0.75345 | -0.71497 | -0.18893 | 0.00514        | -0.85 |
|                        | ECC75                           | 0.66481 | -0.63086 | -0.16671 | 0.00454        | -0.75 |

## 2 Additional experimental details

Following a similar strategy as presented in the Methods section of the main text, but taking the difference between the diffraction patterns associated with solutions that differ only by the H/D substitution on acetate (both in D<sub>2</sub>O and H<sub>2</sub>O solutions), we obtained the first-order differences  $\Delta S_{\text{H}_{\text{non}}}^{\text{X}_{\text{H}_2\text{O}}}(\mathcal{Q})$  and  $\Delta S_{\text{H}_{\text{non}}}^{\text{X}_{\text{D}_2\text{O}}}(\mathcal{Q})$  (Fig. S1), that report on the correlation between non-exchangeable H on Ac and every other atom (X) in the system. They are respectively defined as (in units of mbarns):

$$\begin{aligned}
 \Delta S_{\text{H}_{\text{non}}}^{\text{X}_{\text{D}_2\text{O}}}(\mathcal{Q}) &= S[d_3\text{Ac}-h_{12}\text{TMA}]^{\text{D}_2\text{O}}(\mathcal{Q}) - S[h_3\text{Ac}-h_{12}\text{TMA}]^{\text{D}_2\text{O}}(\mathcal{Q}) \\
 &= 20.1 \cdot S_{\text{H}_{\text{Ac}}\text{D}_\text{W}}(\mathcal{Q}) + 9.4 \cdot S_{\text{H}_{\text{Ac}}\text{O}}(\mathcal{Q}) \\
 &\quad + 2.2 \cdot S_{\text{H}_{\text{Ac}}\text{C}}(\mathcal{Q}) + 0.5 \cdot S_{\text{H}_{\text{Ac}}\text{N}}(\mathcal{Q}) \\
 &\quad - 2.4 \cdot S_{\text{H}_{\text{Ac}}\text{H}_{\text{TMA}}}(\mathcal{Q}) + 0.2 \cdot S_{\text{H}_{\text{Ac}}\text{H}_{\text{Ac}}}(\mathcal{Q}) - 30.0
 \end{aligned} \tag{S1}$$

$$\begin{aligned}
 \Delta S_{\text{H}_{\text{non}}}^{\text{X}_{\text{H}_2\text{O}}}(\mathcal{Q}) &= S[d_3\text{Ac}-h_{12}\text{TMA}]^{\text{H}_2\text{O}}(\mathcal{Q}) - S[h_3\text{Ac}-h_{12}\text{TMA}]^{\text{H}_2\text{O}}(\mathcal{Q}) \\
 &= -11.3 \cdot S_{\text{H}_{\text{Ac}}\text{H}_\text{W}}(\mathcal{Q}) + 9.4 \cdot S_{\text{H}_{\text{Ac}}\text{O}}(\mathcal{Q}) \\
 &\quad + 2.2 \cdot S_{\text{H}_{\text{Ac}}\text{C}}(\mathcal{Q}) + 0.5 \cdot S_{\text{H}_{\text{Ac}}\text{N}}(\mathcal{Q}) \\
 &\quad - 2.4 \cdot S_{\text{H}_{\text{Ac}}\text{H}_{\text{TMA}}}(\mathcal{Q}) + 0.2 \cdot S_{\text{H}_{\text{Ac}}\text{H}_{\text{Ac}}}(\mathcal{Q}) + 1.4
 \end{aligned} \tag{S2}$$

The difference between Equation S1 and S2 yields the second order difference which now reports on a single correlation between the first nuclei that was substituted (H/D on the acetate), and the second nuclei (H/D on water) (see Equation S3) as shown in Figure S1.

$$\begin{aligned}
 \Delta\Delta S_{\text{H}_{\text{Ac}}\text{H}_\text{W}}(\mathcal{Q}) &= S[d_3\text{Ac}-h_{12}\text{TMA}]^{\text{D}_2\text{O}}(\mathcal{Q}) - S[h_3\text{Ac}-h_{12}\text{TMA}]^{\text{D}_2\text{O}}(\mathcal{Q}) \\
 &\quad - (S[d_3\text{Ac}-h_{12}\text{TMA}]^{\text{H}_2\text{O}}(\mathcal{Q}) - S[h_3\text{Ac}-h_{12}\text{TMA}]^{\text{H}_2\text{O}}(\mathcal{Q})) \\
 &= 31.4 \cdot (S_{\text{H}_{\text{Ac}}\text{H}_\text{W}}(\mathcal{Q}) - 1)
 \end{aligned} \tag{S3}$$

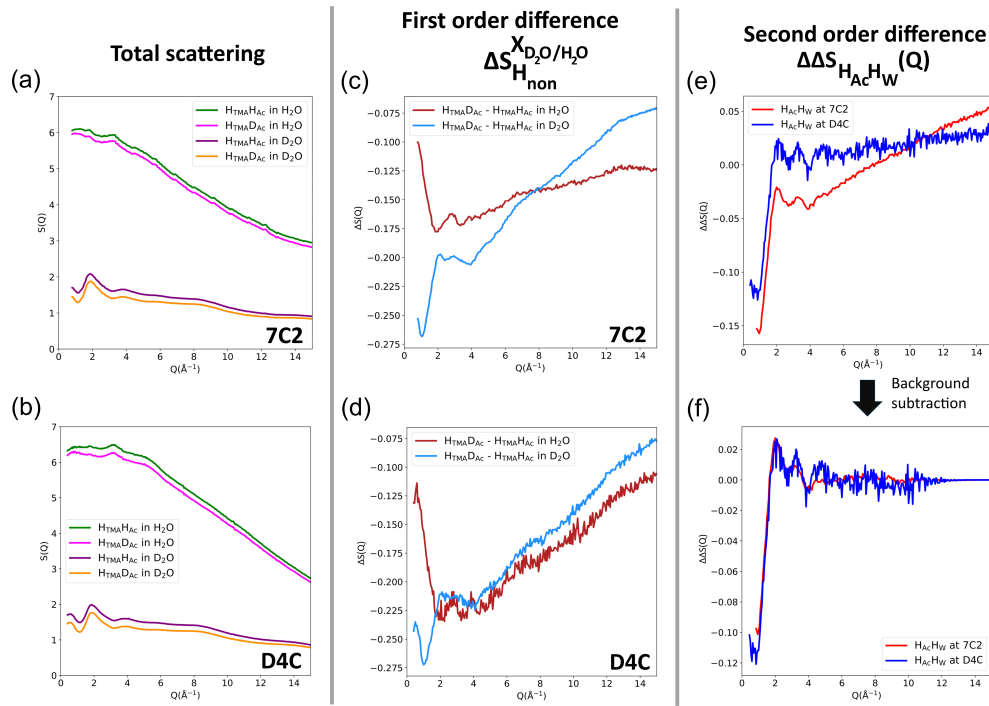

Figure S1: Total diffraction patterns for the solutions of the isotopic compositions of the 4 samples:  $h_{12}\text{TMA}-h_3\text{Ac}$  ( $\text{H}_{\text{TMA}}\text{H}_{\text{Ac}}$ , green) and  $h_{12}\text{TMA}-d_3\text{Ac}$  ( $\text{H}_{\text{TMA}}\text{D}_{\text{Ac}}$ , magenta) in  $\text{H}_2\text{O}$ ;  $h_{12}\text{TMA}-h_3\text{Ac}$  ( $\text{H}_{\text{TMA}}\text{H}_{\text{Ac}}$ , violet) and  $h_{12}\text{TMA}-d_3\text{Ac}$  ( $\text{H}_{\text{TMA}}\text{D}_{\text{Ac}}$ , orange) in  $\text{D}_2\text{O}$  for experiments measured at (a) 7C2 and (b) D4C. First order differences of  $\Delta S_{\text{H}_{\text{non}}}^{\text{X}_{\text{H}_2\text{O}}}(Q)$  (red) and  $\Delta S_{\text{H}_{\text{non}}}^{\text{X}_{\text{D}_2\text{O}}}(Q)$  (light blue) for samples measured at (c) 7C2 and (d) D4C. (e) Second order difference  $31.4 \cdot (S_{\text{H}_{\text{Ac}}\text{H}_W}(Q) - 1)$ , obtained at 7C2 (red) and at D4C (blue). (f) Second order differences after the background subtraction and terminating data up to  $13 \text{ \AA}^{-1}$ .

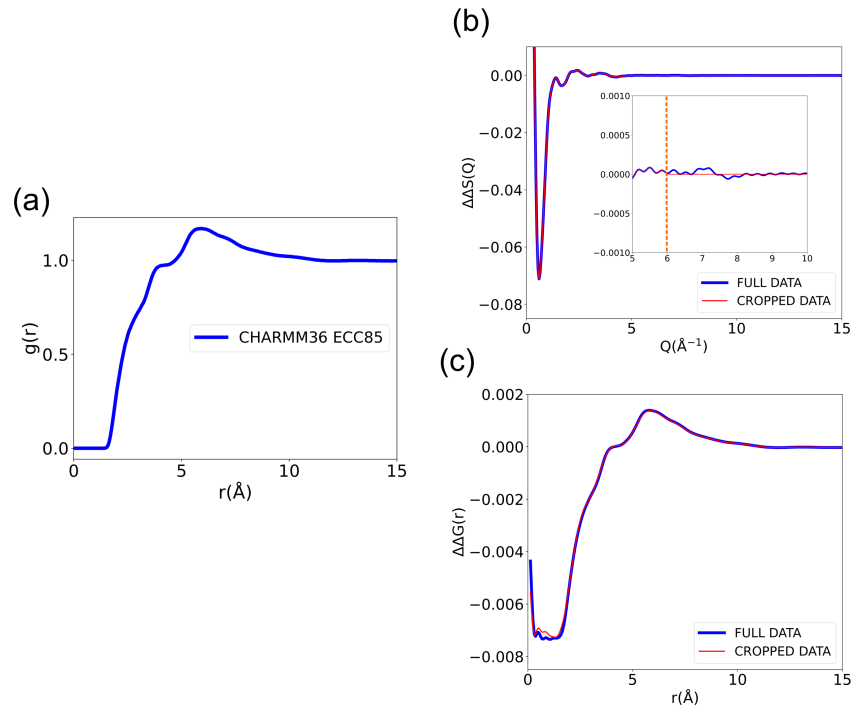

Figure S2: (a) Radial distribution function from TMA hydrogen atoms to acetate hydrogen atoms,  $g(r_{\text{H}_{\text{TMA}}-\text{H}_{\text{Ac}}})$ , from the MD simulation using CHARMM36-ECC85. (b) Comparison of the second order difference of  $\Delta\Delta S_{\text{H}_{\text{TMA}}\text{H}_{\text{Ac}}}(Q)$  from the full vs. terminated (at  $6 \text{ \AA}^{-1}$ ) data in the  $Q$ -range. (c) The two sets of MD data transformed back to  $R$ -space show no effects of the data terminating.

### 3 Additional MD analyses

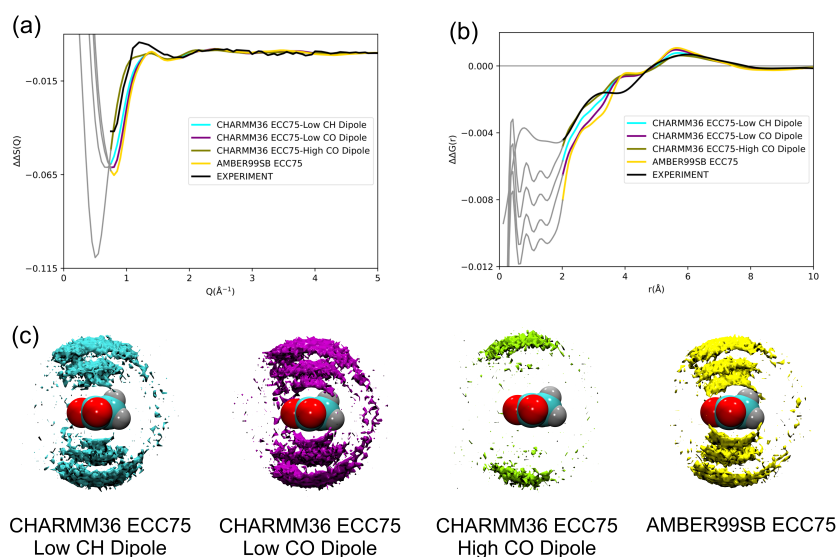

Figure S3: Comparison of the second order difference of  $\Delta\Delta S_{H_{TMA}H_{Ac}}(Q)$  of CHARMM36-Low CH dipole (cyan), CHARMM36-Low CO dipole (purple), CHARMM36-High CO dipole (olive), and AMBER99SB-ECC75 (yellow) versus experiment at 7C2 (black) in (a) reciprocal space (Q-space) and (b) real space (R-space). (c) The density maps show the density of  $H_{TMA}$  around acetate corresponding for the used force fields.

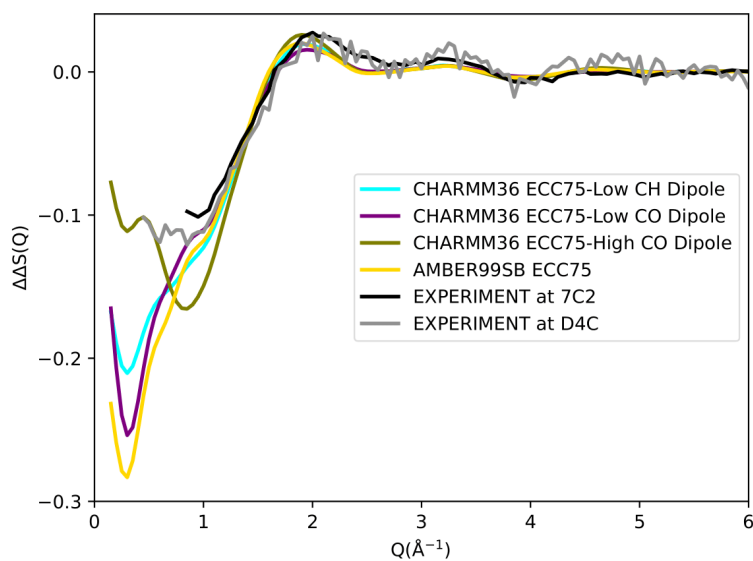

Figure S4: Comparison of second order difference  $\Delta\Delta S_{H_{Ac}H_{water}}(Q)$  of experiments at 7C2 (black) and D4C (gray) vs. FFMD simulations with different force fields: CHARMM36-Low CH dipole (cyan), CHARMM36-Low CO dipole (purple), CHARMM36-High CO dipole (olive), and AMBER99SB-ECC75 (yellow).

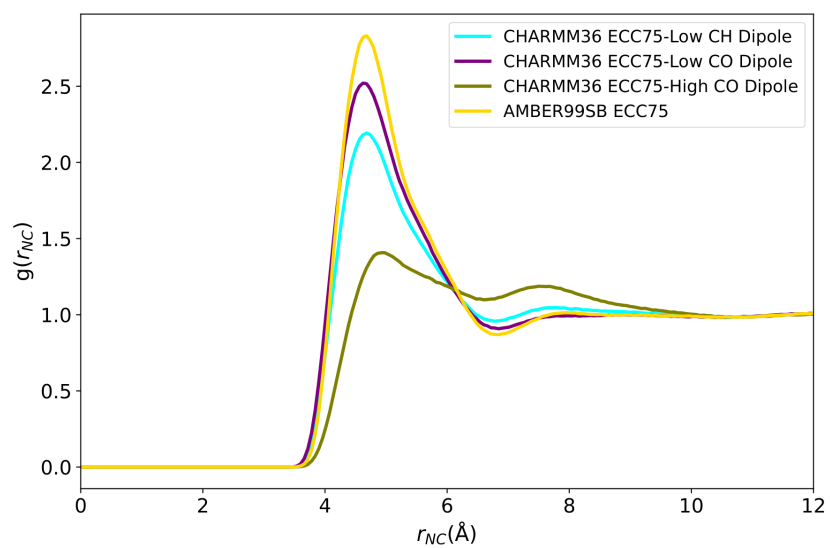

Figure S5: Radial distribution functions from the TMA nitrogen atom to the acetate carboxyl carbon atom,  $g(r_{N_{TMA}-C_{Ac}})$  from CHARMM36-Low CH dipole (cyan), CHARMM36-Low CO dipole (purple), CHARMM36-High CO dipole (olive), and AMBER99SB-ECC75 (yellow) force fields.
